# Supplementary material for: Green interfacial synthesis of two-dimensional poly(2,5-dimethoxyaniline) nanosheets as a promising electrode for high performance electrochemical capacitors
Source: Royal Society of Chemistry journal article supplement (doi:10.1039/c4ra02755h), 2014-01-01
Supplement: c4ra02755h1.pdf [file c4ra02755h1.pdf]

## Electronic Supplementary Information

---

### **Green interfacial synthesis of two-dimensional poly(2, 5-dimethoxyaniline) nanosheets as a promising electrode for high performance electrochemical capacitors**

Changzhou Yuan <sup>a, c, \*</sup>, Longhai Zhang <sup>a</sup>, Linrui Hou <sup>a</sup>, Jingdong Lin <sup>b, \*</sup> and Gang Pang <sup>a</sup>

<sup>a</sup> School of materials Science & Engineering, Anhui University of Technology, Ma'anshan, 243002, P. R. China. E-mail: [ayuan cz@163.com](mailto:ayuan cz@163.com)

<sup>b</sup> Department of Chemistry, College of Chemistry and Chemical Engineering, Xiamen University, Xiamen, 361005, P. R. China. Email: [jdlin@xmu.edu.cn](mailto:jdlin@xmu.edu.cn)

<sup>c</sup> Chinese Academy of Science (CAS) Key Laboratory of Materials for Energy Conversion, Hefei, 230026, P. R. China

#### **Experimental Section**

*Materials Synthesis.* Ammonium persulfate ((NH<sub>4</sub>)<sub>2</sub>S<sub>2</sub>O<sub>8</sub>, APS), sodium chloride (NaCl), hydrogen peroxide (H<sub>2</sub>O<sub>2</sub>, 30 wt.%), acetonitrile, concentrated hydrochloric acid (HCl, 37 wt.%), ferric chloride (FeCl<sub>3</sub>, 99%) and 2, 5-dimethoxyaniline (DMA, 98%) were purchased from Sigma Aldrich. And 1-ethyl-3-methyl imidazolium tetrafluoroborate ([Emim]BF<sub>4</sub>, 95%) was purchased from Chengjie Chemical Co. LTD (Shanghai, China). Typically, the interfacial reaction was performed as follows. 0.05 g of DMA was added into 15 mL of [Emim]BF<sub>4</sub> to form a non-aqueous phase. Then, 0.2 mL of H<sub>2</sub>O<sub>2</sub> and 1.2 g of NaCl were added into 15 mL of 1 M HCl, and the mixture

solution was used as the aqueous phase, which was set above the ionic liquid phase to construct a green two-phase synthetic system. After polymerization reaction for 5 h, the resultant PDMA was collected, washed with copious amounts of 1 M HCl and acetonitrile to remove the unreacted monomer, oligomers and salt, and further dried in vacuum oven at 50 °C for 12 h. In addition, 15 mL of 1 M HCl with 0.019 g of APS or 0.022 g of FeCl<sub>3</sub> were also used as oxidants for the interfacial polymerization of other PDMA samples, while other synthetic parameters were still kept the same. The resulting PDMA products were then denoted as PDMA-APS and PDMA-FeCl<sub>3</sub>, respectively. For further comparison, a homogenous synthesis was carried out as follows: 15 mL of 1 M HCl with 1.2 g of NaCl and 0.2 mL H<sub>2</sub>O<sub>2</sub> was added slowly into the 15 mL of [Emim]BF<sub>4</sub> with 0.05 g of DMA under stirring. After polymerization reaction for 5 h, the PDMA was also fabricated.

*Materials Characterization.* The samples were examined by powder X-ray diffraction (XRD) (Max 18 XCE, Japan) using a Cu K $\alpha$  source ( $\lambda = 0.154056$  nm) at a scanning speed of 3° min<sup>-1</sup> over a  $2\theta$  range of 5 - 35°. The morphologies and structures were observed with field-emission scanning electron microscopy (FESEM, JEOL-6300F, 15 kV) and Fourier transform infrared (FT-IR) spectra (360 Nicolet AVATAR FT-IR). Brunauer-Emmett-Teller (BET) measurement was carried out through measuring N<sub>2</sub> adsorption-desorption isotherms at 77 K by using an ASAP-2010 surface area analyzer. Round PDMA tablets was obtained by pressing (~20 MPa) 20 mg of the obtained PDMA samples using a tablet compression machine. And the thickness and diameter of the round tablet were measured by a vernier caliper. The as-fabricated round N-CNSs tablet was further used for the electronic conductivity measurement by a four-point probe meter (SDY-5, Guangzhou, China) at room temperature.

*Electrochemical Measurements.* The working electrode was prepared with the electroactive material

PDMA, acetylene black (AB) and polytetrafluoroethylene (PTFE) in a weight ratio of 5 : 1.5 : 0.5, which were smeared onto the graphite substrates for following electrochemical tests by cyclic voltammetry (CV), chronopotentiometry (CP) and electrochemical impedance spectroscopy (EIS) measurements performed with an IVIUM electrochemical workstation (the Netherlands). The typical mass of the electroactive PDMA is 5 mg in the working electrode. All experiments were carried out in a three-electrode cell with a working electrode, a platinum plate counter electrode (1 cm<sup>2</sup>) and a saturated calomel electrode (SCE) reference electrode at room temperature. The electrolyte used here was 1 M HCl aqueous solution. The cycling performance was carried out with a CT2001D tester (Wuhan, China). The specific capacitances of the PDMA electrodes can be calculated by using the following equation:

$$C = \frac{It}{\Delta V} \quad (1)$$

where  $C$ ,  $I$ ,  $t$  and  $\Delta V$  are the specific capacitance (F g<sup>-1</sup>), discharge current (A g<sup>-1</sup>), discharging time (s), and discharge potential interval (V) of the PDMA electrodes, respectively. Another important parameter, coulombic efficiency ( $\eta$ ) can be evaluated from the equation (2), where  $t_D$  and  $t_C$  are the discharging time and charging time, respectively.

$$\eta = \frac{t_D}{t_C} \times 100\% \quad (2)$$

In addition, a quasi-capacitor was fabricated by using two PDMA NS electrodes face to face in 1 M HCl aqueous solution. The specific energy density ( $E$ ) and specific power density ( $P$ ) of the PDMA NS-based symmetric capacitor were calculated from the equations (3, 4) as follows.

$$E = \frac{1}{2} CV^2 \quad (3) \quad P = \frac{E}{t} \quad (4)$$

where  $V$  and  $t$  are the electrochemical working potential range and discharge time of the PDMA-

based symmetric device.

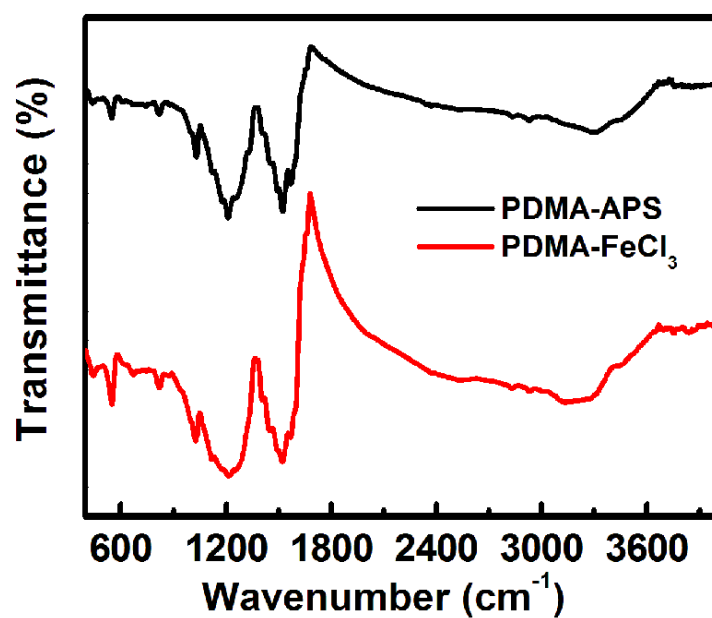

**Fig. S1** FT-IR spectra of the as-obtained PDMA-APS and PDMA-FeCl<sub>3</sub> samples as indicated

As seen from the Fig. S1, the FT-IR spectra of the PDMA-APS and PDMA-FeCl<sub>3</sub> are greatly similar to that for the as-synthesized PDMA NSs.

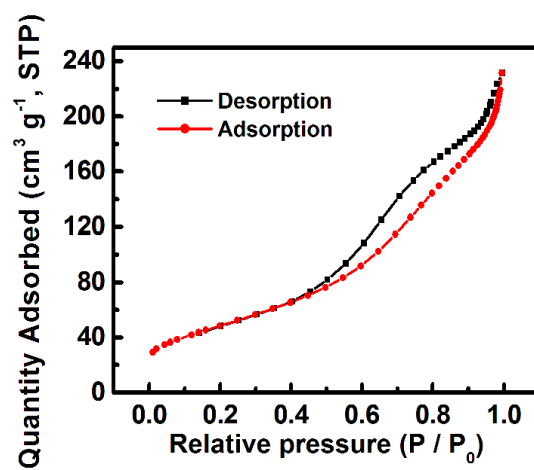

**Fig. S2** N<sub>2</sub> adsorption-desorption isotherm of the as-obtained PDMA NS sample

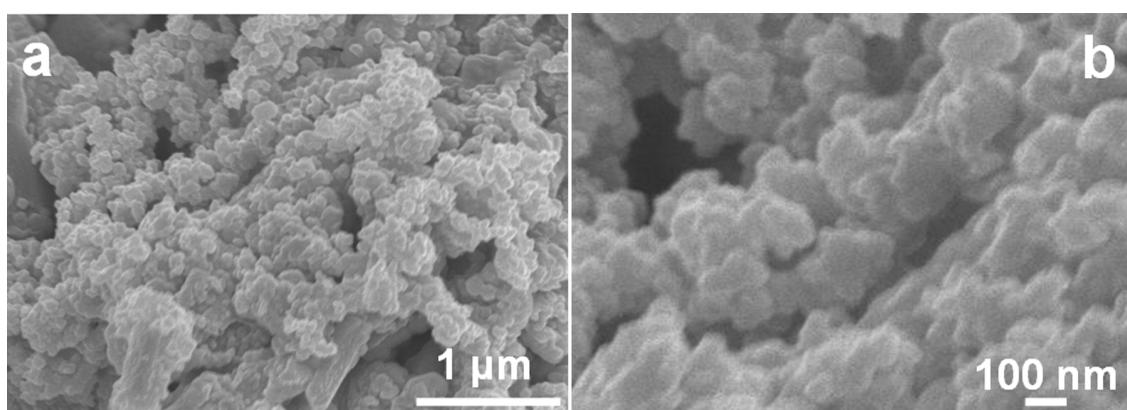

**Fig. S3** FESEM images of the as-obtained PDMA *via* non-interfacial, *i.e.*, homogeneous synthesis by using  $\text{H}_2\text{O}_2$  as an oxidant

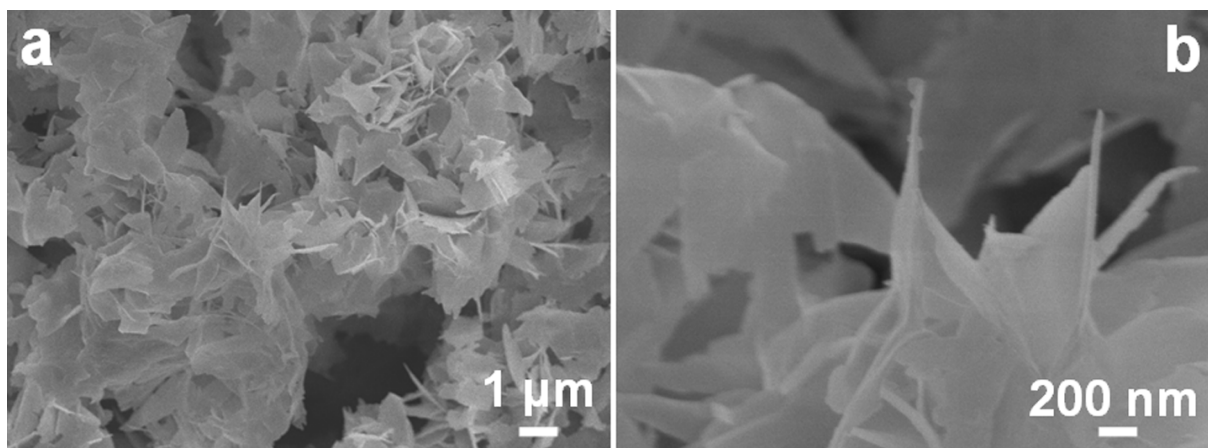

**Fig. S4** FESEM images of the as-obtained PDMA *via* interfacial synthesis by using H<sub>2</sub>O<sub>2</sub> as an oxidant without the NaCl during the synthetic procedure

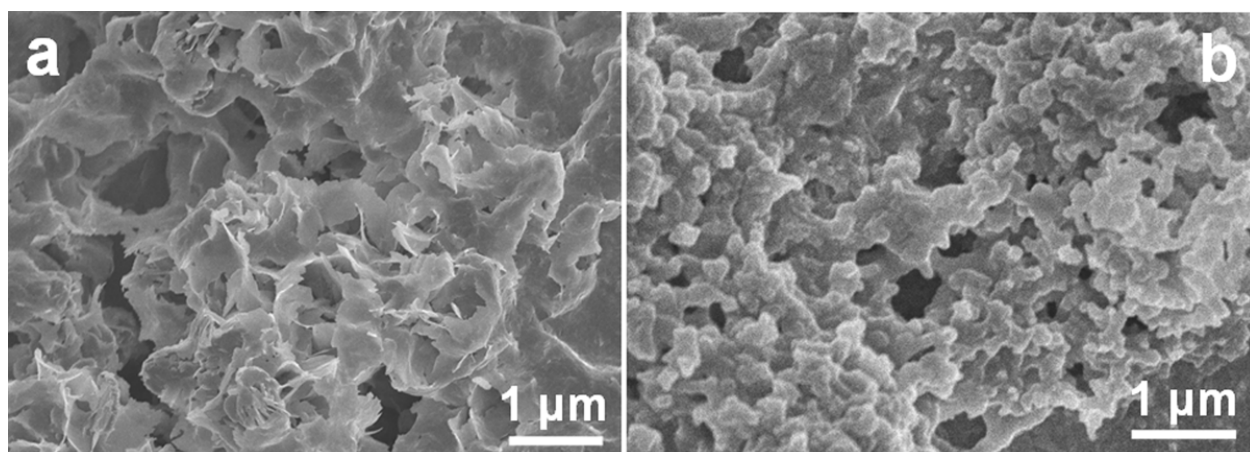

**Fig. S5** FESEM images of the resulting PDMA-FeCl<sub>3</sub> (a) and PDMA-APS (b) samples



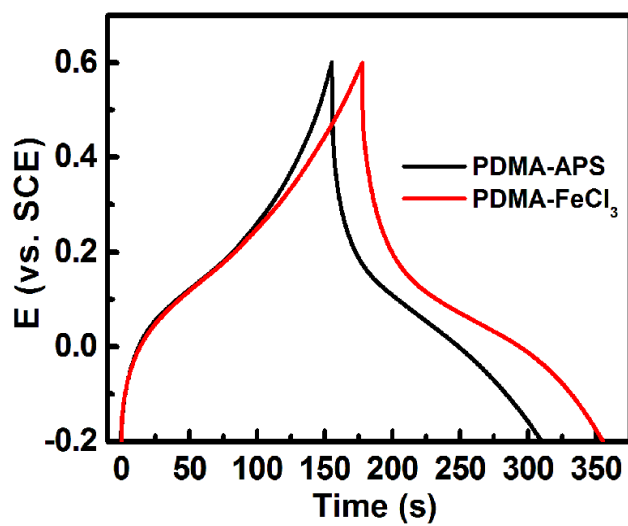

**Fig. S6** CP plots of the as-synthesized PDMA-FeCl<sub>3</sub> and PDMA-APS electrodes at a current density of 0.5 A g<sup>-1</sup> as indicated

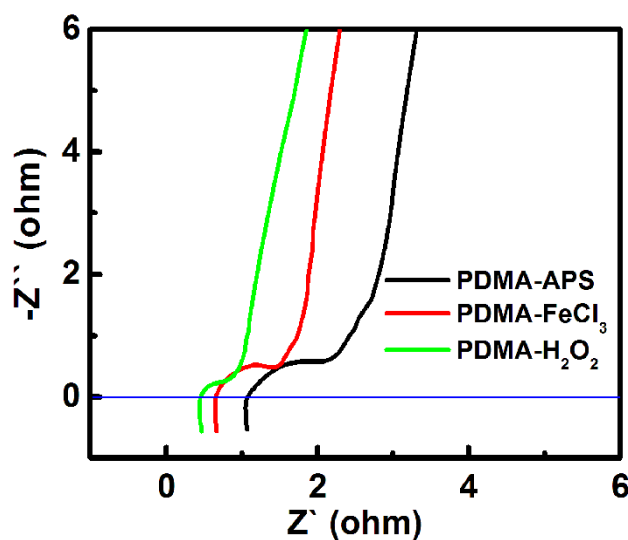

**Fig. S7** EIS spectra of the as-synthesized PDMA-APS, PDMA-FeCl<sub>3</sub> and PDMA-H<sub>2</sub>O<sub>2</sub> electrodes as indicated

Commonly, the intersection of the EIS plot at the X-axis demonstrates the solution resistance ( $R_s$ ), which commonly includes the following three terms: the resistance of the KOH aqueous solution, the intrinsic resistance of the electroactive material itself, and the contact resistance at the interface between electroactive materials and current collector. Obviously, the  $R_s$  for the PDMA-H<sub>2</sub>O<sub>2</sub>, PDMA-FeCl<sub>3</sub>, and PDMA-APS electrodes were observed as  $\sim 0.5$ ,  $\sim 0.7$  and  $\sim 1.1$  ohm, respectively. And at the high-medium frequency region, a semicircle can be

found and its diameter stands for the charge-transfer resistance ( $R_{ct}$ ) during the electrochemical process. And the  $R_{ct}$  for the PDMA- $\text{H}_2\text{O}_2$ , PDMA- $\text{FeCl}_3$ , and PDMA-APS electrodes were observed as  $\sim 0.4$ ,  $\sim 0.9$  and  $\sim 1.3$  ohm, respectively. In addition, in the low frequency region, the slope of the impedance plot almost tends to a vertical asymptote, indicating the typical electrochemical capacitance of the three PDMA electrodes in 1 M HCl aqueous solution.

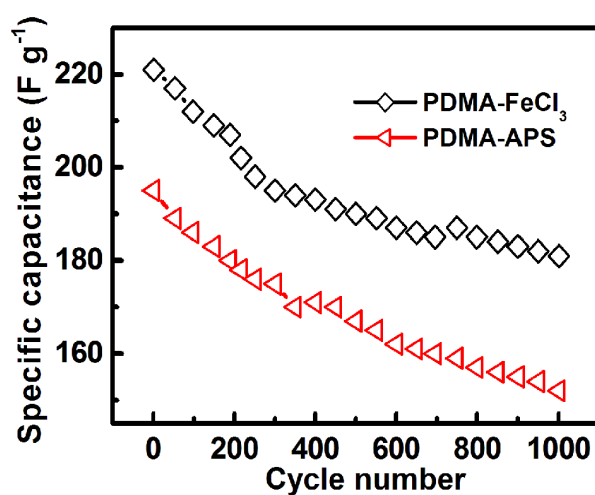

**Fig. S8** Cycle performance ( $0.5 \text{ A g}^{-1}$ ) of the as-prepared PDMA- $\text{FeCl}_3$  and PDMA-APS samples as indicated

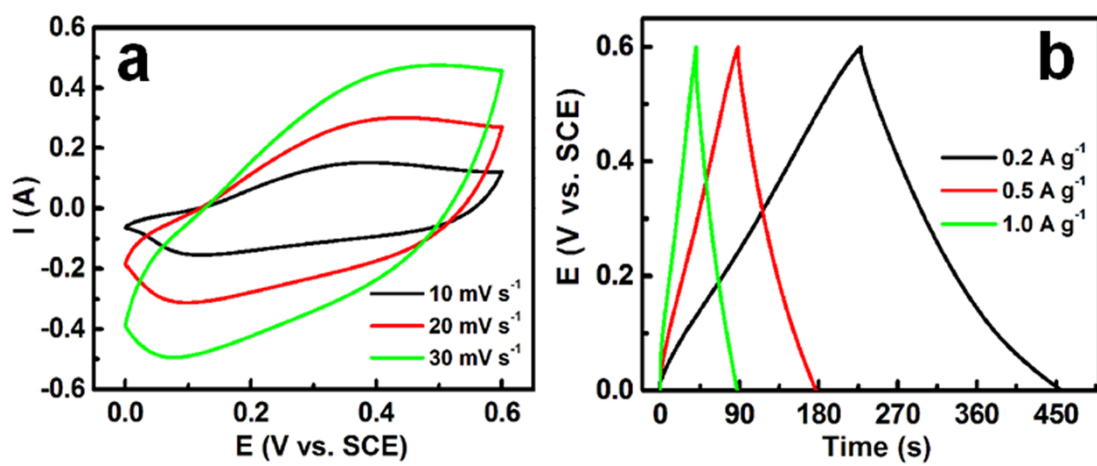

**Fig. S9** Typical CV curves and CP plots of the as-fabricated PDMA NS-based supercapacitors
